# Supplementary material
Source: PubMed Central journal article supplement (PMC3005290)
Supplement: NIHMS255876-supplement-Supplemental_Data.pdf [file NIHMS255876-supplement-Supplemental_Data.pdf]

## Supplementary Materials for **Identification of Therapeutic Targets for Quiescent, Chemotherapy-Resistant Human Leukemia Stem Cells**

Yoriko Saito, Hiroshi Kitamura, Atsushi Hijikata, Mariko Tomizawa-Murasawa, Satoshi Tanaka, Shinsuke Takagi, Naoyuki Uchida, Nahoko Suzuki, Akiko Sone, Yuho Najima, Hidetoshi Ozawa, Atsushi Wake, Shuichi Taniguchi, Leonard D. Shultz, Osamu Ohara, Fumihiko Ishikawa\*

\*To whom correspondence should be addressed. E-mail: f\_ishika@rcai.riken.jp

Published 3 February 2010, *Sci. Transl. Med.* **2**, 17ra9 (2010)  
DOI: 10.1126/scitranslmed.3000349

### **The PDF file includes:**

- Table S1. Summary of analyses performed on AML patient samples.
- Table S2 legend. List of LSC signature genes.
- Table S3 legend. List of primers and probes for qRT-PCR.
- Fig. S1. LSC-specific expression of 58 genes was validated by qRT-PCR.
- Fig. S2. WT1 and HCK are frequently overexpressed in LSCs.
- Fig. S3. Candidate LSC target molecules show expression in human AML cells lining the BM endosteum.
- Fig. S4. CD25 is expressed in cell cycle–quiescent AML cells in the BM endosteal region.
- Fig. S5. Expression of CD32 and CD25 in nonhematopoietic tissues.

**Other Supplementary Material for this manuscript includes the following:**  
(available at [www.sciencetranslationalmedicine.org/cgi/content/full/2/17/17ra9/DC1](http://www.sciencetranslationalmedicine.org/cgi/content/full/2/17/17ra9/DC1))

- Table S2. List of LSC signature genes. (Microsoft Excel format).
- Table S3. List of primers and probes for qRT-PCR. (Microsoft Excel format).

| ID | Gender | Age | FAB          | Cytogenetics                                           | U133              | 1.0ST             | qPCR    | 25-gene hierarchical clustering | Flow cytometry |               |         |               |               | Positive LSC markers by flow cytometry |               |
|----|--------|-----|--------------|--------------------------------------------------------|-------------------|-------------------|---------|---------------------------------|----------------|---------------|---------|---------------|---------------|----------------------------------------|---------------|
|    |        |     |              |                                                        | Fig. 2A, Table S1 | Fig. 2A, Table S1 | Fig. S1 | Fig. 2C                         | Fig. 4A,B      | CD32          |         | CD25 MFI      | CD18 MFI      |                                        | CD93 MFI      |
|    |        |     |              |                                                        |                   |                   |         |                                 |                | MFI           | Pattern |               |               |                                        |               |
| 1  | M      | 53  | M0           | complex including -7                                   |                   |                   |         |                                 | Yes            | 2229          | a       | na            | na            | na                                     | 32            |
| 2  | M      | 60  | M0           | complex including t(11;19)(q23;p13.1)                  |                   |                   |         | P(1)                            | Yes            | 206           | c       | 215           | 141           | 91                                     | none          |
| 3  | M      | 79  | M1           | complex                                                | P(1)R(2)          | R(1)              | R(1)    |                                 | Pilot case     | 657           | b       | 363           | 925           | 529                                    | 18            |
| 4  | M      | 55  | M1           | +8, t(8;13)(q22;q12)                                   |                   |                   |         | P(1)                            | Yes            | 343           | c       | 884           | 993           | 122                                    | 25, 18        |
| 5  | F      | 64  | M1           | complex involving t(15;17)                             |                   |                   |         | R(1)                            | Yes            | 158           | c       | 1798          | 577           | 231                                    | 25            |
| 6  | M      | 44  | M1           | inv(12)(p13q22)                                        |                   |                   |         |                                 | Yes            | 1012          | c       | 269           | 77            | 299                                    | 32            |
| 7  | M      | 69  | M1           | complex                                                |                   |                   |         |                                 | Yes            | 4516          | a       | 165           | 967           | 360                                    | 32, 18        |
| 8  | M      | 69  | M1           | complex                                                |                   |                   |         | P(1)                            | Yes            | 1413          | a       | 312           | 1549          | 576                                    | 32, 18        |
| 9  | na     | na  | M1           | 46, XY, -7                                             |                   |                   |         | R(1)                            | Yes            | 48            | c       | 190           | 51            | 211                                    | none          |
| 10 | M      | 32  | M1           | add(3)(q21), add(4)(q31), -7, +mar                     |                   |                   |         | P(1)                            | Yes            | 1013          | a       | 154           | 146           | 181                                    | 32            |
| 11 | M      | 25  | M2           | t(1;16)(q32;q24), t(6;9)(p23;q34)                      | P(1)R(1)          | R(1)              | R(1)    |                                 | Pilot case     | 1335          | a       | 219           | 1842          | 333                                    | 32, 18        |
| 12 | F      | 70  | M2           | complex                                                | P(1)              | R(1)              | R(1)    |                                 | Pilot case     | 118           | b       | 322           | 635           | 1                                      | none          |
| 13 | M      | 61  | M2           | t(3;4)(q27;p12)                                        | P(1)              |                   |         |                                 | Yes            | 1486          | a       | 2870          | 1110          | 112                                    | 32, 25, 18    |
| 14 | F      | 52  | M2           | add(5)(q731), t(7;11)(p15;p15), +8, add(12)(p11.2)     | P(1)              |                   |         |                                 | Yes            | 118           | c       | 159           | 190           | 112                                    | none          |
| 15 | F      | 58  | M2           | 46, XX                                                 |                   | R(1)              | R(1)    |                                 | Pilot case     | 948           | a       | 1810          | 688           | 923                                    | 32, 25, 93    |
| 16 | M      | 48  | M2           | t(7;17)(q32;q21)                                       |                   |                   |         |                                 | Yes            | 1516          | a       | 292           | 79            | 136                                    | 32            |
| 17 | M      | 35  | M2           | complex including t(8;21)(q22;q22)                     |                   |                   |         | P(1)                            | Yes            | 401           | c       | 1504          | 270           | 325                                    | 25            |
| 18 | M      | 59  | M2           | complex including -5, -7                               |                   |                   |         |                                 | Yes            | 222           | c       | 125           | 196           | 1103                                   | 93            |
| 19 | M      | 43  | M2           | complex                                                |                   |                   |         |                                 | Yes            | 379           | b       | 372           | 84            | 246                                    | 93            |
| 20 | M      | na  | M2           | na                                                     |                   |                   |         |                                 | Yes            | 78            | b       | 749           | 121           | 120                                    | none          |
| 21 | M      | 45  | M2           | ins(1;7)(q21;?), +8                                    |                   |                   |         |                                 | Yes            | 159           | b       | 363           | 1141          | 285                                    | 18            |
| 22 | F      | 56  | M2           | complex including -7                                   |                   |                   |         | P(1)                            | Yes            | 122           | c       | 148           | 950           | 224                                    | 18            |
| 23 | M      | 62  | M2           | complex                                                |                   |                   |         |                                 | Yes            | 1937          | a       | 533           | 1859          | 1196                                   | 32, 18, 93    |
| 24 | M      | 49  | M2           | +10, ?11, add(9)(q13)                                  |                   |                   |         |                                 | Yes            | 292           | b       | 120           | 504           | 111                                    | none          |
| 25 | F      | 54  | M2           | t(8;21)(q22;q22), t(9;12)(p22;p11.2)                   |                   |                   |         | P(1)                            | Yes            | 316           | b       | 243           | 135           | 72                                     | none          |
|    | M      | na  | M2           | na                                                     | P(1)R(1)          |                   |         |                                 | No             | na            | na      | na            | na            | na                                     | na            |
| 26 | M      | na  | M4           | na                                                     | P(1)R(1)          | R(1)              | R(1)    |                                 | Pilot case     | 1187          | a       | 296           | 4116          | 2107                                   | 32, 18, 93    |
| 27 | F      | 48  | M4           | 46, XX                                                 | P(1)R(1)          |                   |         |                                 | Pilot case     | 1559          | a       | 368           | 1192          | 326                                    | 32, 18        |
| 28 | M      | 43  | M4-Eo        | inv(16)(p13q22), +22                                   |                   | P(1)              |         |                                 | Yes            | 1281          | a       | 214           | 71            | 70                                     | 32            |
| 29 | M      | 56  | M4           | add(2)(q273)                                           |                   |                   |         |                                 | Yes            | 340           | b       | 855           | 260           | 127                                    | 25            |
| 30 | M      | 61  | M5a          | complex                                                |                   |                   |         |                                 | Yes            | 1737          | a       | 171           | 1867          | 372                                    | 32, 18        |
| 31 | M      | 64  | M7           | complex including -7                                   |                   |                   |         |                                 | Yes            | 3726          | a       | 370           | 123           | 285                                    | 32            |
| 32 | F      | 59  | undetermined | t(6;9)(p23;q34)                                        |                   |                   |         |                                 | Yes            | 4892          | a       | 413           | 535           | 279                                    | 32            |
| 33 | M      | 57  | MDS/AML      | complex                                                | P(1)              |                   |         |                                 | Yes            | 399           | b       | 3339          | 101           | 673                                    | 25            |
| 34 | M      | 69  | MDS/AML      | +8                                                     | P(2)*             |                   |         |                                 | Yes            | 268           | c       | 131           | 652           | 151                                    | none          |
| 35 | M      | 66  | MDS/AML      | del(11)(p11.2)                                         | P(1)              |                   |         |                                 | Yes            | 144           | c       | 152           | 38            | 48                                     | none          |
| 36 | M      | 87  | MDS/AML      | na                                                     | P(1)              |                   |         |                                 | Yes            | 241           | c       | 421           | 128           | 168                                    | none          |
| 37 | F      | 67  | MDS/AML      | +8                                                     | P(1)              |                   |         |                                 | Yes            | 98            | c       | 92            | 118           | 53                                     | none          |
| 38 | F      | 82  | MDS/AML      | t(6;9)(p23;q34)                                        | P(1)              |                   |         |                                 | Yes            | 486           | b       | 320           | 115           | 152                                    | none          |
| 39 | M      | 45  | MDS/AML      | t(3;19)(q21;p13)                                       |                   |                   |         |                                 | Yes            | 2201          | a       | 1155          | nd            | nd                                     | 32, 25        |
| 40 | M      | 62  | MDS/AML      | +1, der(1;7)(q10;p10)                                  |                   |                   |         |                                 | Yes            | 927           | a       | 1033          | 53            | 195                                    | 32, 25        |
| 41 | M      | 66  | MDS/AML      | na                                                     |                   |                   |         |                                 | Yes            | 487           | b       | 2878          | 60            | 63                                     | 25            |
| 42 | M      | 59  | MDS/AML      | del(5)(q22q33), del(11)(q13q23)                        |                   |                   |         |                                 | Yes            | 718           | b       | 1312          | 471           | 163                                    | 25            |
| 43 | F      | 63  | MDS/AML      | complex including 5q-, -7                              |                   |                   | R(1)    |                                 | Yes            | 121           | c       | 952           | 303           | 468                                    | 25            |
| 44 | M      | 68  | MDS/AML      | 50, XY, del(20)(q11.2), +del(20)(q11.2), +21, +21, +21 |                   |                   | R(2)    |                                 | Yes            | 309           | c       | 4789          | 90            | 291                                    | 25            |
| 45 | M      | 83  | MDS/AML      | complex                                                |                   |                   |         |                                 | Yes            | 412           | c       | 1651          | 451           | 666                                    | 25            |
| 46 | M      | 69  | MDS/AML      | complex including -7                                   |                   |                   |         |                                 | Yes            | 286           | c       | 912           | 232           | 287                                    | 25            |
| 47 | M      | 60  | MDS/AML      | t(3;3)(q21;q26)                                        |                   |                   |         | R(2)                            | Pilot case     | 709           | b       | 182           | 1588          | 279                                    | 18            |
| 48 | M      | 71  | MDS/AML      | complex                                                |                   |                   |         |                                 | Yes            | 162           | c       | 431           | 764           | 535                                    | none          |
| 49 | M      | 71  | MDS/AML      | t(1;3)(p36;q21)                                        |                   |                   |         | P(1)R(2)                        | Yes            | 59            | b       | 281           | 84            | 105                                    | none          |
| 50 | M      | 63  | MDS/AML      | 46, XY                                                 |                   |                   |         |                                 | Yes            | 171           | c       | 316           | 324           | 135                                    | none          |
| 51 | F      | 62  | MDS/AML      | del(7)(q11.2q22)                                       |                   |                   |         |                                 | Pilot case     | 598           | b       | 281           | 3178          | 221                                    | 18            |
| 52 | M      | 61  | MDS/AML      | 46, XY                                                 |                   |                   |         |                                 | Yes            | 693           | b       | 323           | 207           | 193                                    | none          |
| 53 | M      | 65  | MDS/AML      | -7, der(12)(t1;12)(q21;p13)                            |                   |                   |         |                                 | Yes            | 1051          | a       | 119           | 110           | 742                                    | 32            |
| 54 | F      | 63  | MDS/AML      | complex                                                |                   |                   |         |                                 | Yes            | 351           | b       | 33            | 282           | 213                                    | none          |
| 55 | M      | 63  | MDS/AML      | 46, XY                                                 |                   |                   |         |                                 | Yes            | 3118          | a       | 244           | 1144          | 176                                    | 32, 18        |
| 56 | F      | 64  | MDS/AML      | na                                                     |                   |                   |         |                                 | Yes            | 71            | c       | 311           | 28            | 42                                     | none          |
| 57 | M      | 60  | MDS/AML      | del(13)(q12q14)                                        |                   |                   |         |                                 | Yes            | 134           | c       | 70            | 97            | 95                                     | none          |
| 58 | M      | 66  | MDS/AML      | t(4;21)(q31;q22)                                       |                   |                   |         |                                 | Yes            | 126           | b       | 183           | 140           | 147                                    | none          |
| 59 | M      | 60  | MDS/AML      | 46, XY                                                 |                   |                   |         | P(1)                            | Yes            | 463           | b       | 511           | 74            | 134                                    | none          |
| 60 | M      | 60  | MDS/AML      | 47, XY, +8                                             |                   |                   |         | P(1)                            | Yes            | 485           | c       | 481           | 147           | 179                                    | none          |
| 61 | F      | 59  | MDS/AML      | 46, XX                                                 |                   |                   |         | P(1)                            | Yes            | 2184          | a       | 68            | 138           | 113                                    | 32            |
|    |        |     |              | % positive                                             |                   |                   |         |                                 |                | 21/61 (34.4%) |         | 15/61 (24.6%) | 15/61 (24.6%) | 4/61 (6.6%)                            | 39/61 (63.9%) |

**Supplementary Table 1. Summary of analyses performed on AML patient samples.** P(x) and R(y) indicate that the analysis was performed on original patient LSCs at n=x and recipient BM LSCs at n=y, respectively. \*For case #34, a pre-treatment sample and a sample obtained at the time of relapse were analyzed. Pilot cases are the group of eight representative samples in which initial flow cytometry analyses were performed to determine which molecules are most frequently expressed on LSCs. MFI refers to mean fluorescence intensity in LSCs.

**Supplementary Table 2. List of LSC signature genes.**

A total of 259 genes were identified through comprehensive expression analyses using the Human Genome U133 Plus 2.0 (U133) and Human Gene 1.0ST (1.0ST) GeneChips. Genes in Group 1 were found overrepresented in LSCs compared with HSCs in both array platforms. Genes in Group 2 were found overrepresented in LSCs and not expressed in HSCs in either platform. Entrez gene ID, HUGO gene symbol, probe set ID in U133 and 1.0ST platforms, fold difference of expression between LSC and HSC, chromosome number, gene name, and functional class of genes are shown.

**Supplementary Table 3. List of primers and probes for qRT-PCR.**

The first column contains the HUGO gene symbol with the name of dual fluorescence-labeled probes and primers corresponding to the each gene listed in the second column. Third, fourth and fifth columns represent DNA sequence, melting temperature, and length of the each probes and primers, respectively. Sixth and seventh columns provide DNA sequence and length of the amplified products, respectively.

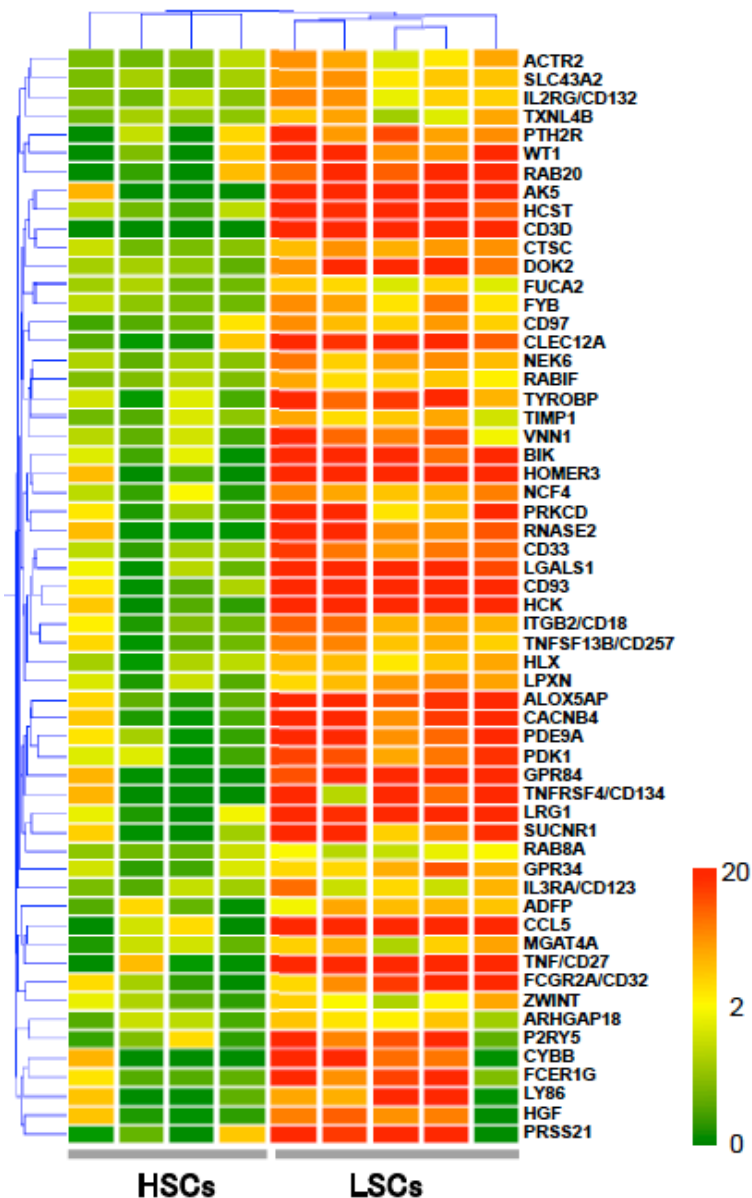

**Supplementary Figure 1. LSC-specific expression of 58 genes was validated by qRT-PCR.** Of the 136 candidate genes examined, 58 showed mRNA levels significantly higher in AML LSCs compared with those in normal human HSCs ( $P < 0.05$  by either Kruskal-Wallis, Wilcoxon-Mann-Whitney, or student's t-test), as represented in a heat-map. In each panel, red, yellow and green represent high, intermediate, and low levels of expression, respectively.

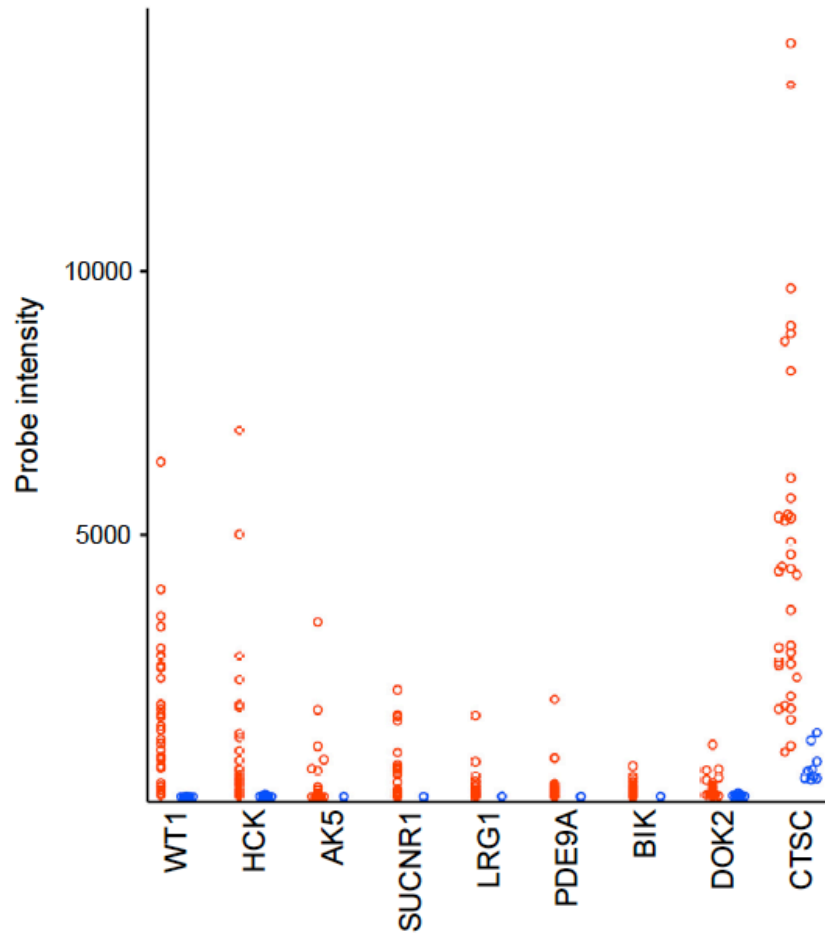

**Supplementary Figure 2. WT1 and HCK are frequently overexpressed in LSCs.** Expression levels of WT1, HCK, DOK2, AK5, SUCNR1, LRG1, PDE9A, BIK and CTSC genes in LSCs (red circles, N=30) and HSCs (blue circles, N=9) obtained using U133 plus array platform. Among the nine genes, WT1 and HCK were most frequently over-expressed in LSCs.

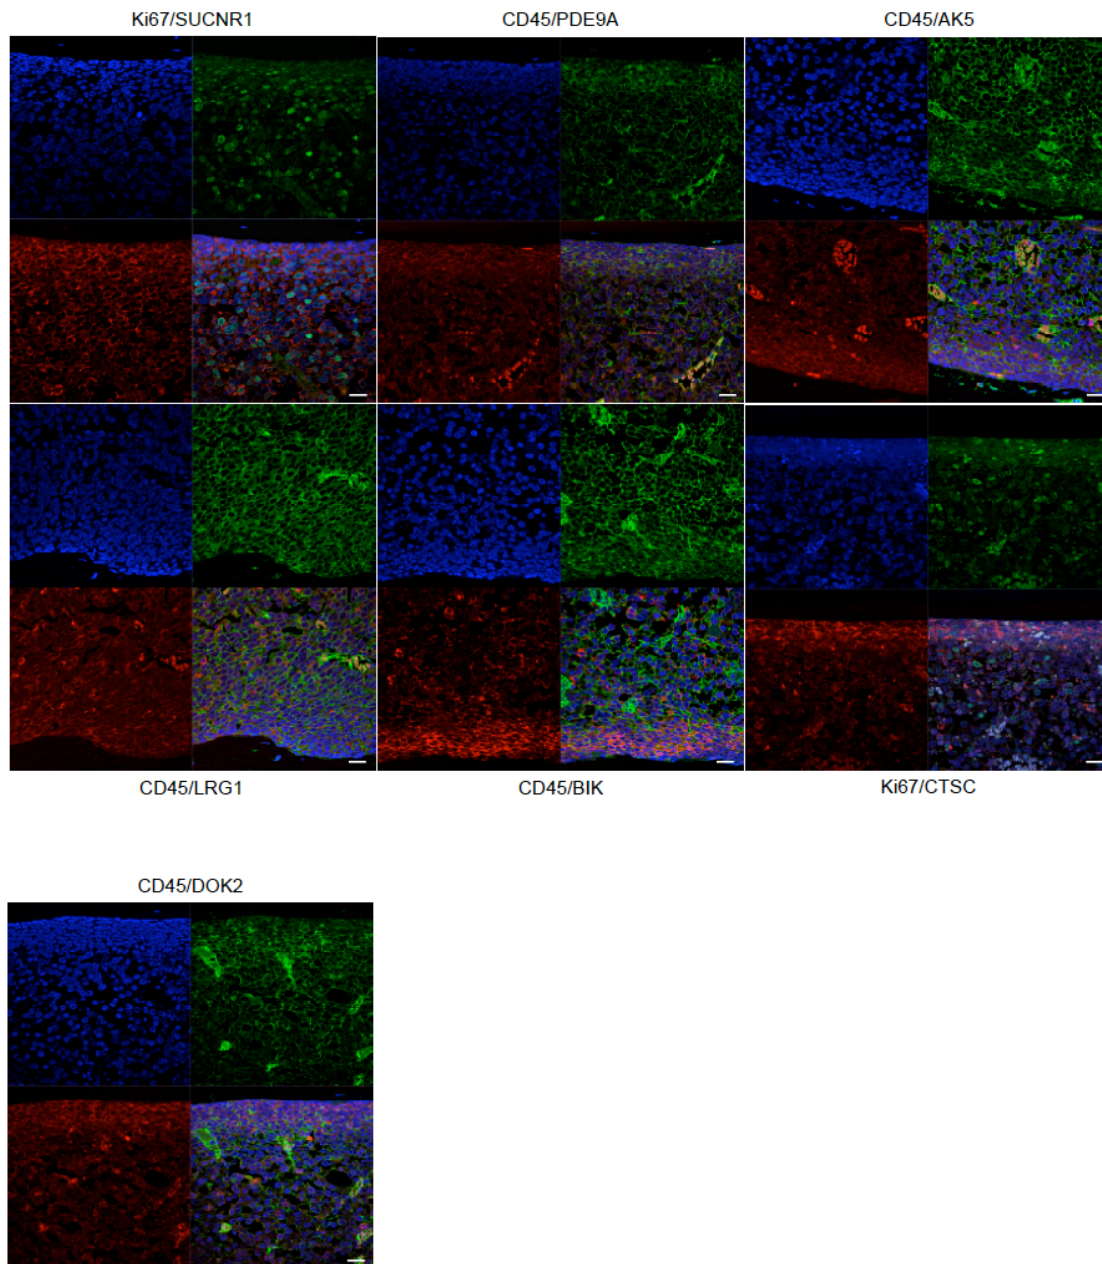

**Supplementary Figure 3. Candidate LSC target molecules show expression in human AML cells lining the BM endosteum.** LSC target molecules SUCNR1, PDE9A, AK5, DOK2, LRG1, BIK and CTSC are expressed in AML cells lining the BM endosteum. Target molecules (red) are co-labeled with hCD45 (green) for PDE9A, AK5, DOK2, LRG1 and BIK and with Ki67 (green) for SUCNR1 and CTSC. Nuclei are labeled with DAPI (blue). The BM %hCD45+CD33+ was greater than 98% in each recipient, indicating that nearly all the cells in the BM are human AML cells. Scale bar, 20 $\mu$ m.

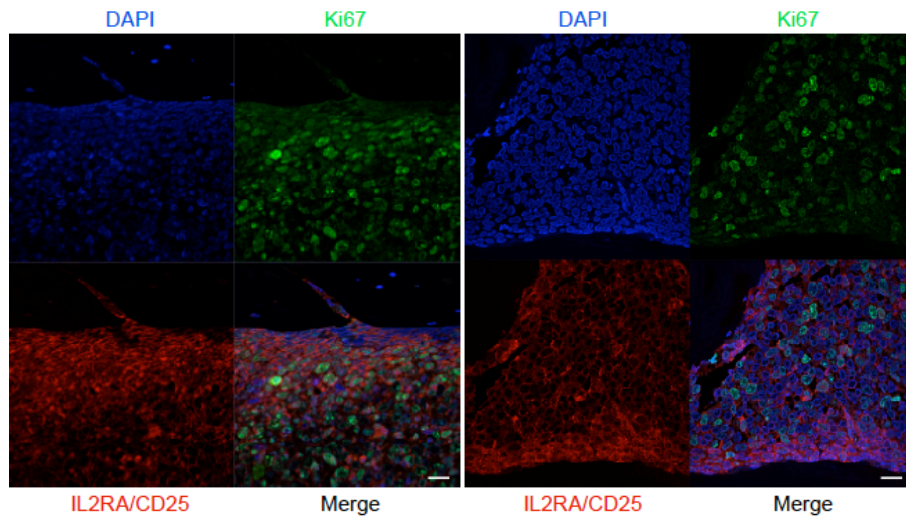

**Supplementary Figure 4. CD25 is expressed in cell cycle-quiescent AML cells in the BM endosteal region.** CD25 (red) is expressed extensively in AML cells in the BM endosteal region and that are predominantly Ki67 negative (green), in femurs from two AML-engrafted recipients. The %hCD45+hCD33+ cells in the recipient BM were 98.4 and 99.6%, indicating that nearly all the cells in the BM are human AML cells. Nuclei are labeled with DAPI. Scale bar, 20 $\mu$ m.



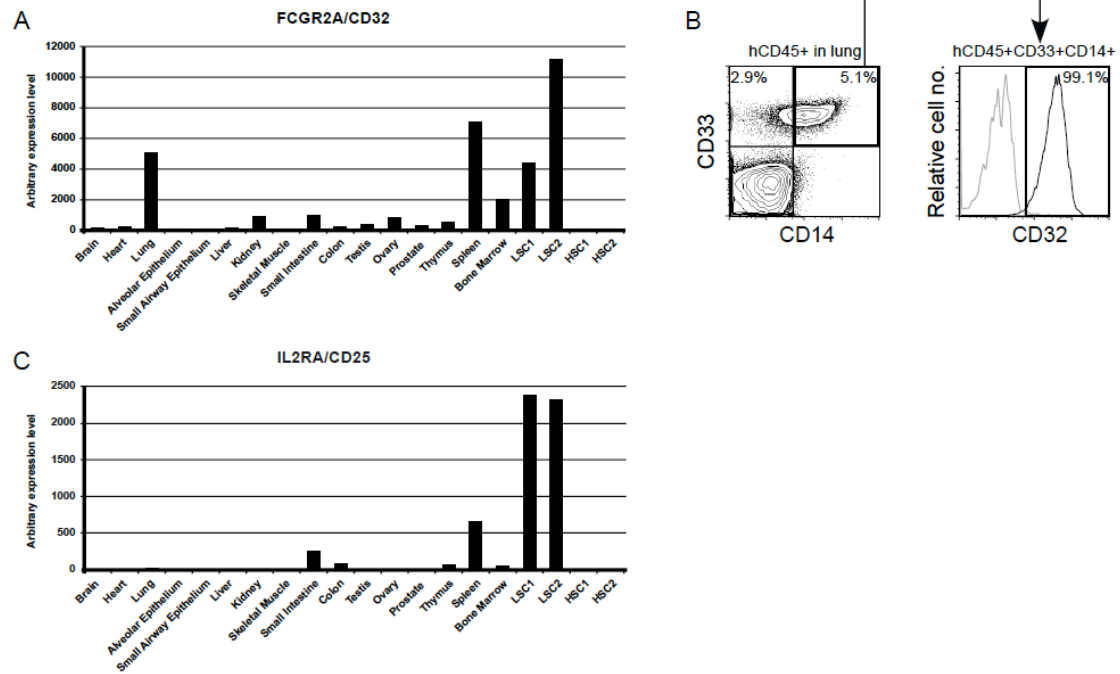

**Supplementary Figure 5. Expression of CD32 and CD25 in nonhematopoietic tissues.** (A) CD32 expression was evaluated by qRT-PCR in various human tissues. (B) hCD45+CD33+CD14+ alveolar macrophages highly express CD32 at the protein-level. (C) CD25 expression was evaluated by qRT-PCR, showing little to no CD25 transcript in various non-hematopoietic organs.
